# Supplementary material for: Randomized Controlled Trial of Adding Telephone Follow-Up to an Occupational Rehabilitation Program to Increase Work Participation
Source: Springer Nature journal article supplement (doi:10.1007/s10926-017-9711-4), 2017-06-09

## Online Resource 2: Text accompanying subgroup analyses

### Randomized controlled trial of adding telephone follow-up to an occupational rehabilitation program to increase work participation.

Karen Walseth Hara MD<sup>1,2,3,4</sup>, Johan Håkon Bjørngaard PhD<sup>1,5</sup>, Søren Brage MD, PhD<sup>6</sup>, Petter Christian Borchgrevink MD, PhD<sup>2,3,7</sup>, Vidar Halsteinli PhD<sup>1,8</sup>, Tore Charles Stiles PhD<sup>9</sup>, Roar Johnsen PhD<sup>1</sup>, Astrid Woodhouse PhD<sup>1,2,3</sup>

<sup>1</sup> Department of Public Health and Nursing, Faculty of Medicine and Health Sciences, Norwegian University of Science and Technology (NTNU), Trondheim, Norway

<sup>2</sup> Norwegian Advisory Unit on Complex Symptom Disorders, St. Olavs Hospital, Trondheim University Hospital, Trondheim, Norway

<sup>3</sup> Department of Circulation and Medical Imaging, Faculty of Medicine and Health Sciences, Norwegian University of Science and Technology (NTNU), Trondheim, Norway

<sup>4</sup> The Norwegian Labour and Welfare Service of Sør-Trøndelag, Trondheim, Norway

<sup>5</sup> Forensic Department and Research Centre Brøset, St. Olavs Hospital, Trondheim University Hospital, Trondheim, Norway

<sup>6</sup> The Norwegian Directorate for Labour and Welfare, Oslo, Norway

<sup>7</sup> Hysnes Rehabilitation Center, St. Olavs Hospital, Trondheim University Hospital, Trondheim Norway

<sup>8</sup> Centre for Health Care Improvement, St. Olavs Hospital, Trondheim University Hospital, Trondheim, Norway

<sup>9</sup> Department of Psychology, Faculty of Social and Educational Sciences, Norwegian University of Science and Technology (NTNU), Trondheim, Norway

Corresponding Author:

Karen Walseth Hara

Norwegian University of Science and Technology (NTNU)

Faculty of Medicine and Health Sciences, Department of Public Health and Nursing

Postbox 8905, 7491 Trondheim, Norway

Phone: + 47 93016098

Fax: + 47 73597577

# Demography

Figure 4.

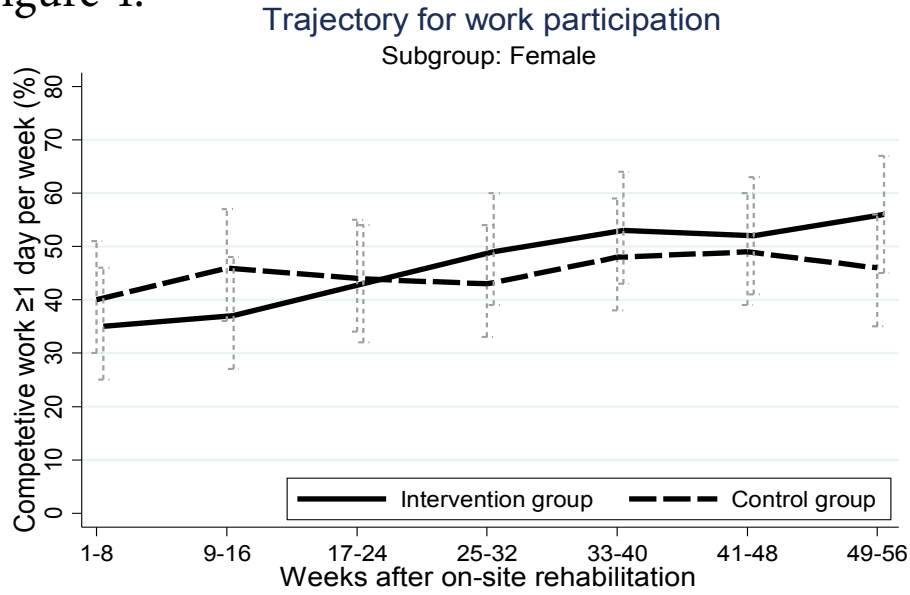

Figure 5a.

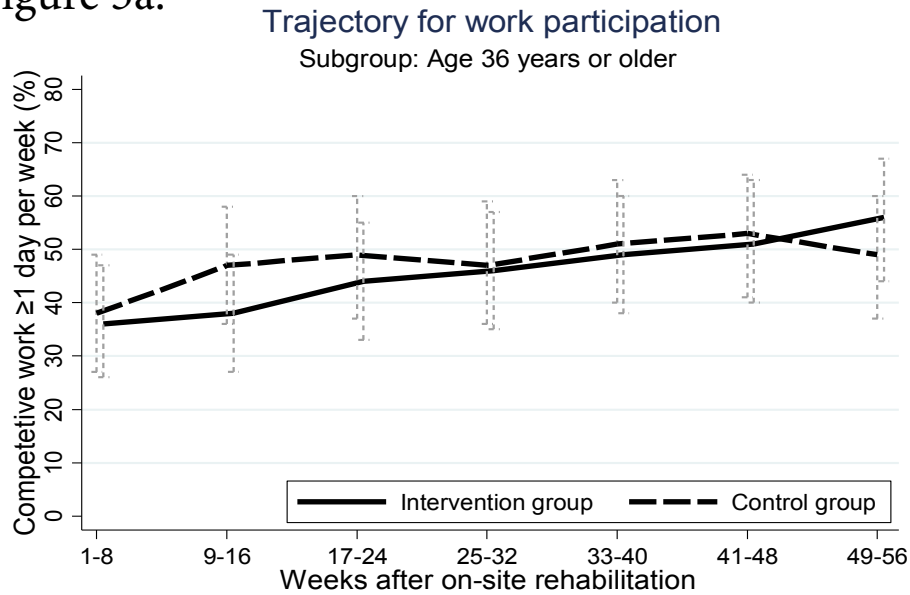

Figure 5b.

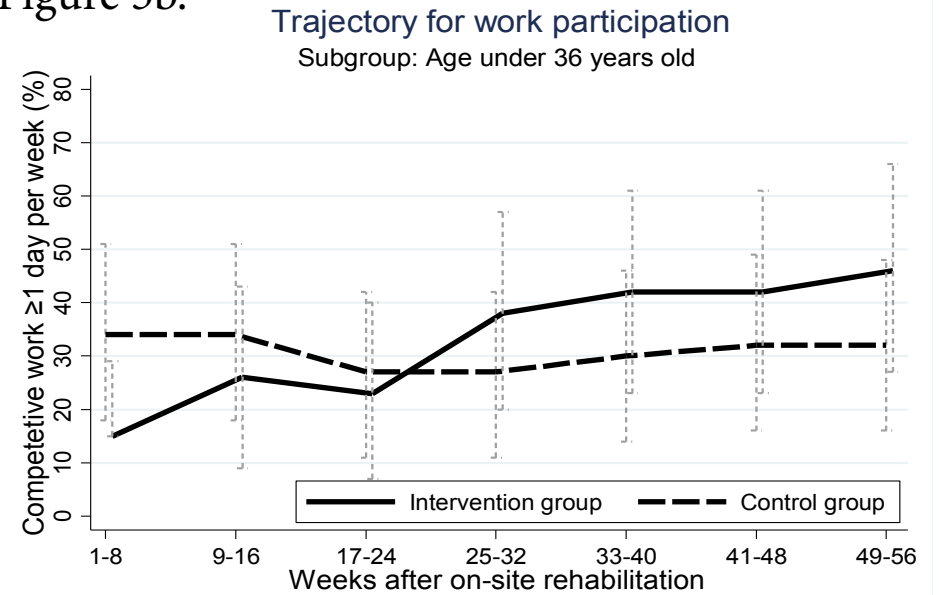

# Demography

Figure 6a.

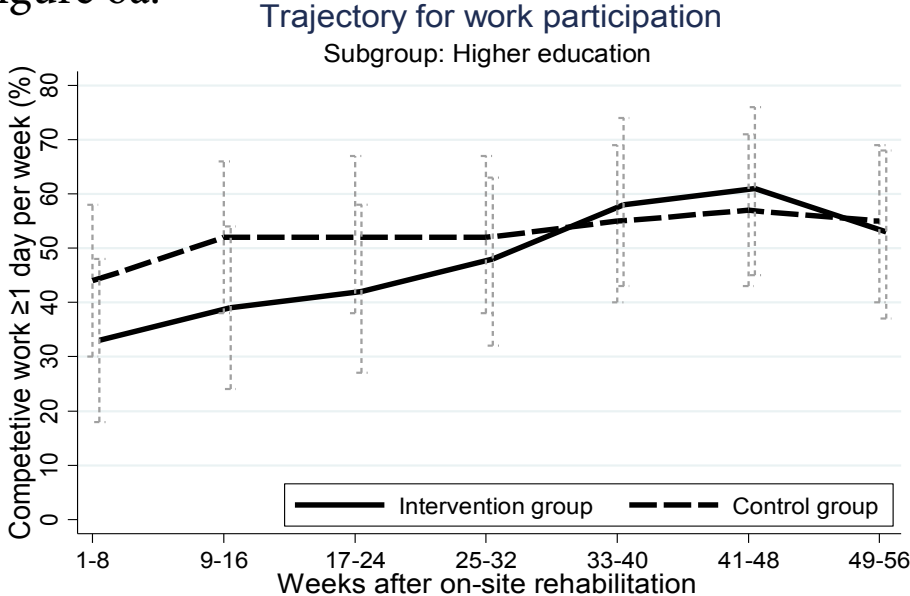

Figure 6b.

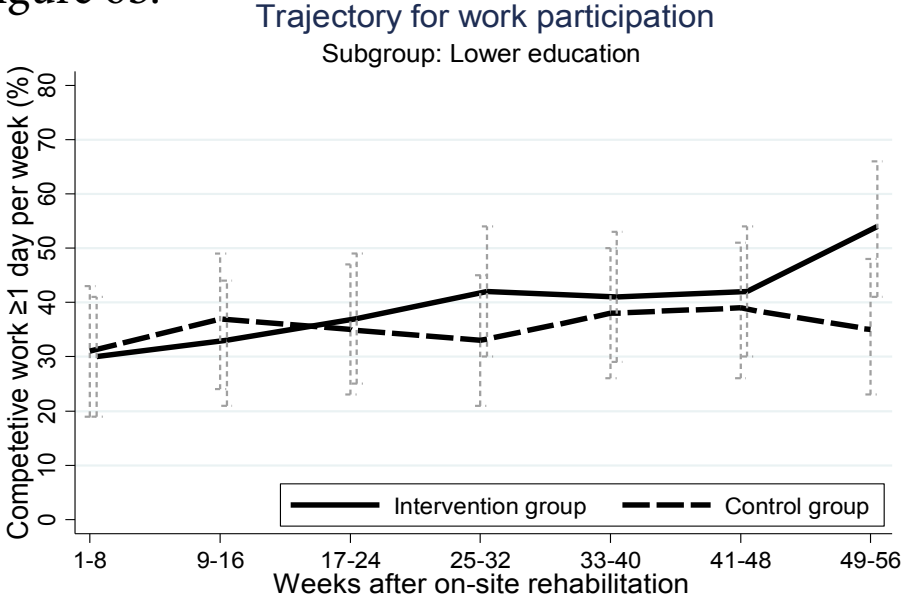

# Work and benefits

Figure 7a.

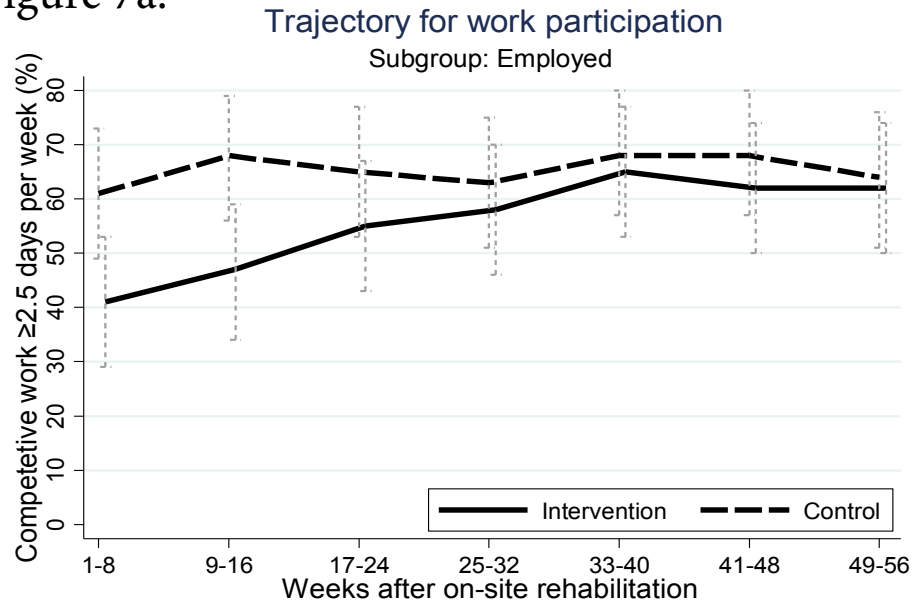

Figure 7b.

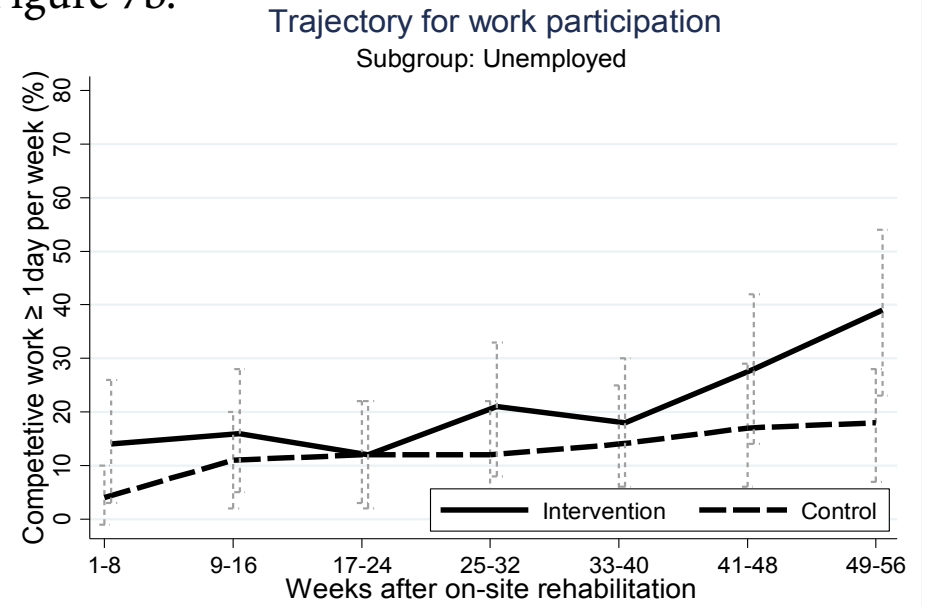

Figure 8a.

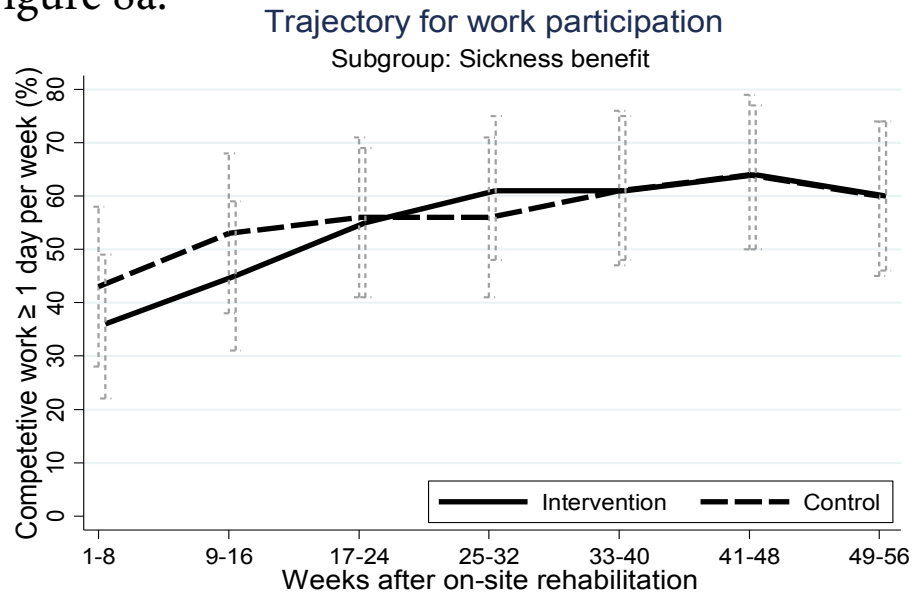

Figure 8b.

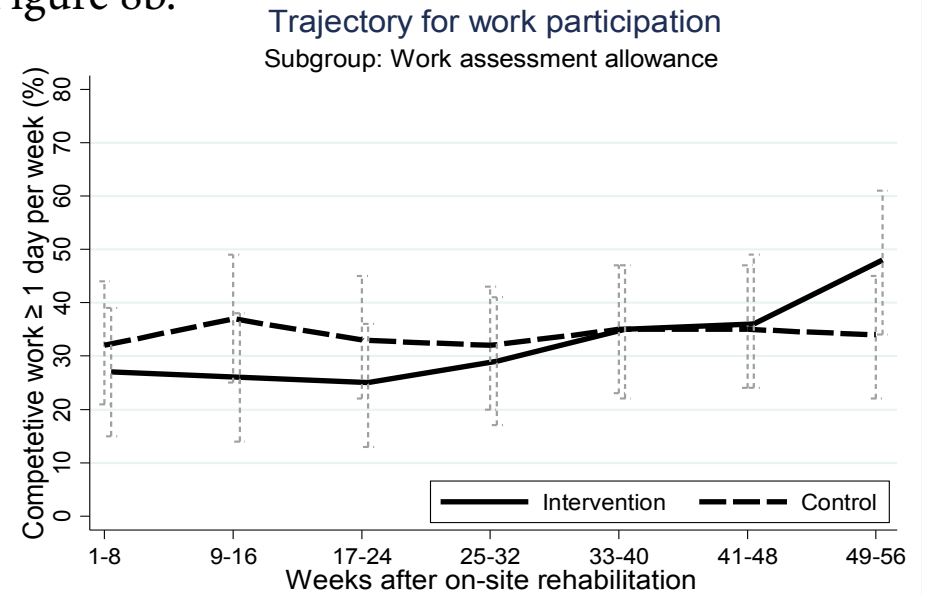

# Health related factors

Figure 9a.

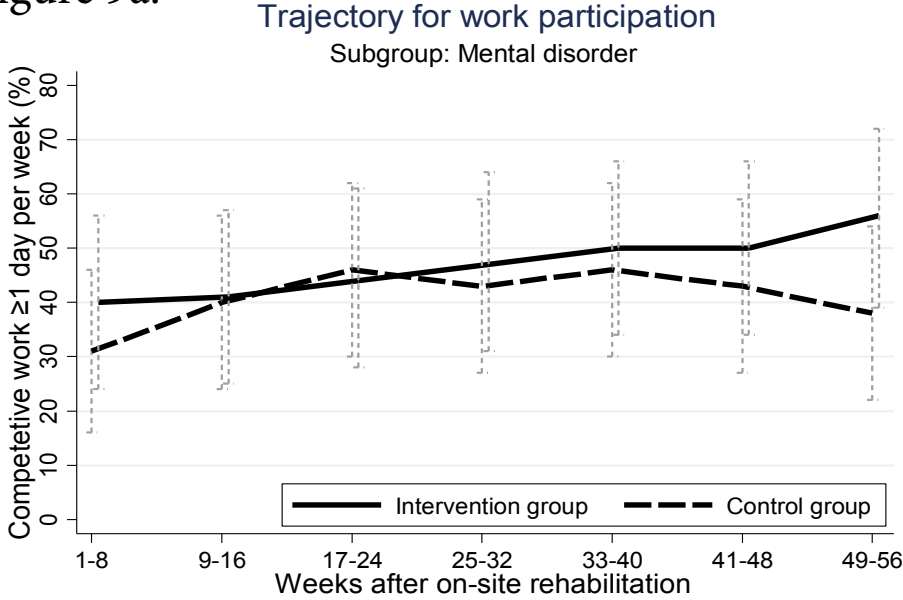

Figure 9b.

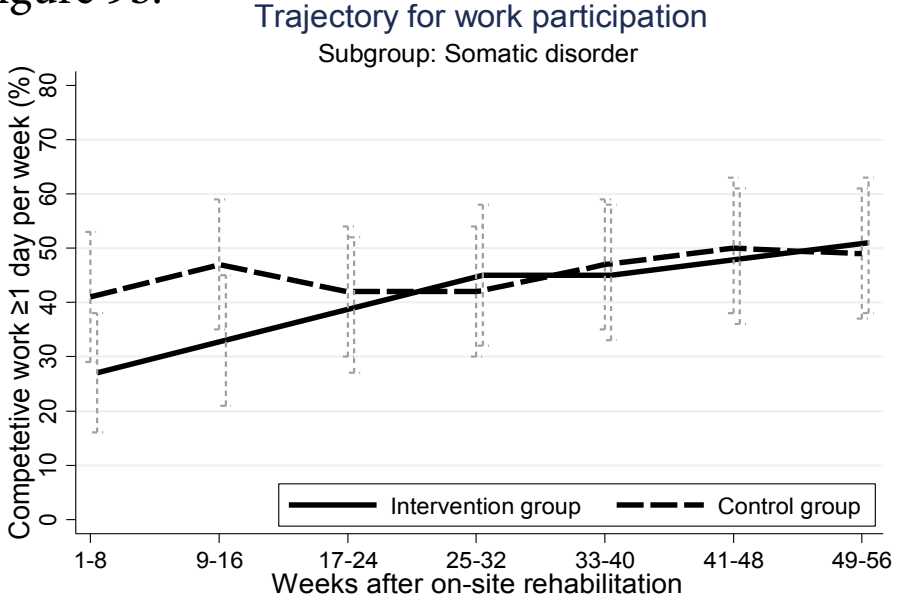

Supplement: MOESM2 [file 12351156]
